# Supplementary material for: The humanistic burden of vitiligo: a systematic literature review of quality‐of‐life outcomes
Source: PubMed Central journal article supplement — J Eur Acad Dermatol Venereol. 2022 May 11;36(9):1507–23. doi: 10.1111/jdv.18129 (PMC9790455; doi:10.1111/jdv.18129), 2022-05-11
Supplement: JDV-36-1507-s001.pdf [file JDV-36-1507-s001.pdf]

## Supplementary Material

### The Humanistic Burden of Vitiligo: A Systematic Literature Review of Quality-of-Life Outcomes

M. Picardo,<sup>1</sup> R.H. Huggins,<sup>2</sup> H. Jones,<sup>3</sup> R. Marino,<sup>3</sup> M. Ogunsola,<sup>3</sup> J. Seneschal<sup>4</sup>

<sup>1</sup>San Gallicano Dermatological Institute IRCCS, Rome, Italy; <sup>2</sup>Henry Ford Health System, Detroit, MI, USA; <sup>3</sup>Incyte Corporation, Wilmington, DE, USA; <sup>4</sup>Department of Dermatology and Pediatric Dermatology, National Reference Center for Rare Skin Disorders, Hôpital Saint-André, CNRS, UMR-5164, ImmunoConCept, F-33000, Bordeaux, France

#### Contents

|                                                                                                                                         |    |
|-----------------------------------------------------------------------------------------------------------------------------------------|----|
| Appendix S1. Search Strategy.....                                                                                                       | 2  |
| Figure S1. Number of Studies by Year of Publication* .....                                                                              | 4  |
| Figure S2. Number of Studies by Country and Geographic Region* .....                                                                    | 5  |
| Table S1. Generic Quality-of-Life Assessment Tools and Outcomes Among Studies That Reported Total Scores in the Overall Population..... | 7  |
| Table S2. Generic Quality-of-Life Assessment Tools and Outcomes in Interventional Studies.....                                          | 9  |
| References .....                                                                                                                        | 11 |

## **Appendix S1. Search Strategy**

### Search String 1: PubMed

(vitiligo[TITLE/ABSTRACT] OR leukoderma[TITLE/ABSTRACT] OR  
leucoderma[TITLE/ABSTRACT])

AND

("quality of life"[TITLE/ABSTRACT] OR QoL[TITLE/ABSTRACT] OR "patient reported  
outcomes"[TITLE/ABSTRACT] OR PROs[TITLE/ABSTRACT])

AND

English[LANGUAGE]

PubMed prescreen hits, 278

### Search String 2: EMBASE

('vitiligo':ti,ab,kw OR 'leukoderma':ti,ab,kw OR 'leucoderma':ti,ab,kw)

AND

('quality of life':ti,ab,kw OR 'QoL':ti,ab,kw OR 'patient reported outcomes':ti,ab,kw OR  
PROs:ti,ab,kw)

AND

'english':la

NOT

('conference abstract':it OR 'conference paper':it OR 'conference review':it)

EMBASE prescreen hits, 297

Search String 3: Scopus

TITLE-ABS-KEY(vitiligo OR leukoderma OR leucoderma)

AND

TITLE-ABS-KEY("quality of life" OR QoL OR "patient reported outcomes" OR PROs)

AND

(LIMIT-TO(LANGUAGE, "English"))

Scopus prescreen hits, 43

Search String 4: Cochrane Database

Title/abstract/keyword (vitiligo OR leukoderma OR leucoderma)

AND

Title/abstract/keyword ("quality of life" OR QoL OR "patient reported outcomes" OR PROs)

Cochrane database prescreen hits, 2

Total number of prescreen hits with duplicates removed: 335

**Figure S1. Number of Studies by Year of Publication\***

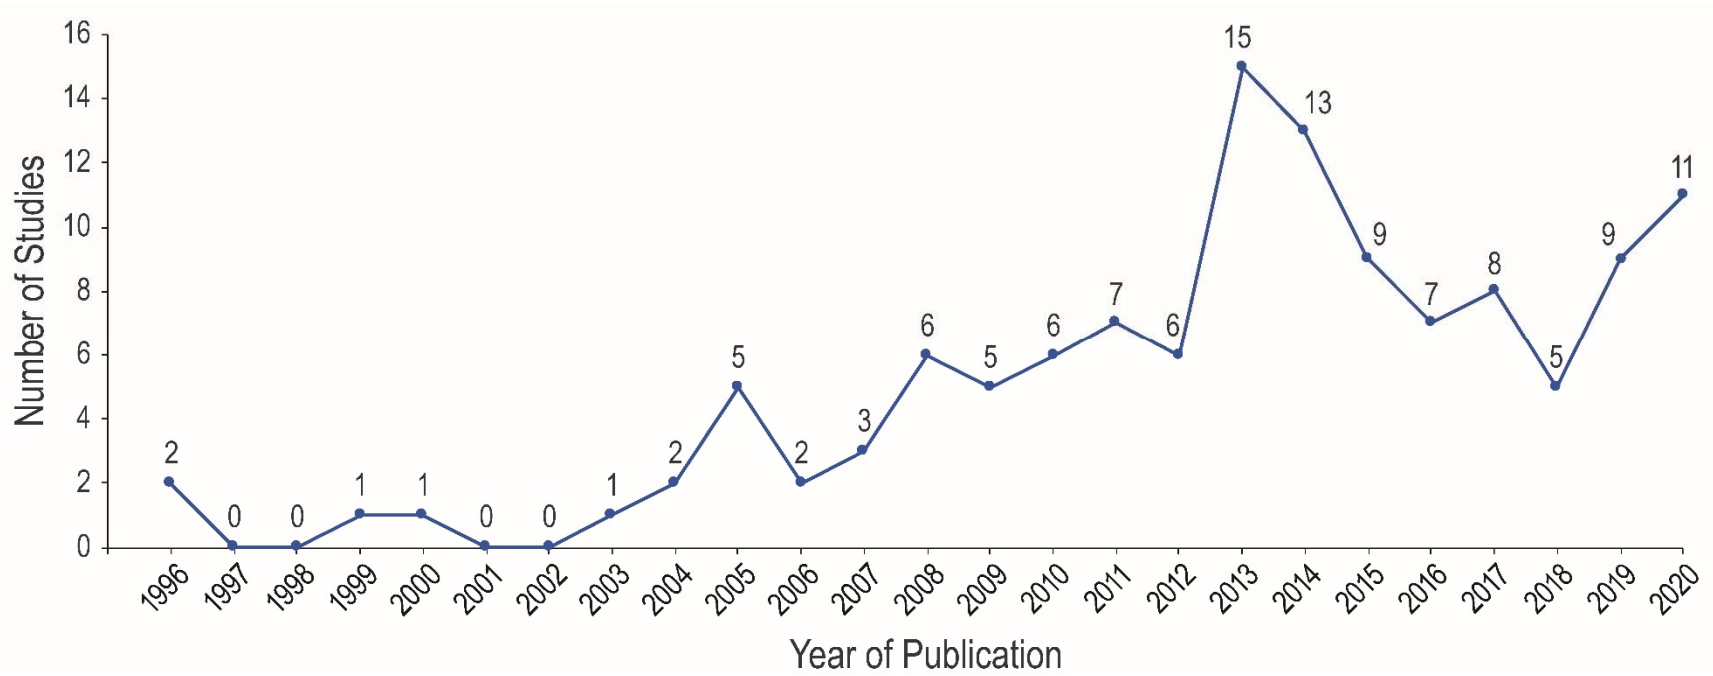

\* 6 included studies published in 2021 were not included in the graph because the 2021 publication period is incomplete.

**Figure S2. Number of Studies by Country and Geographic Region\***

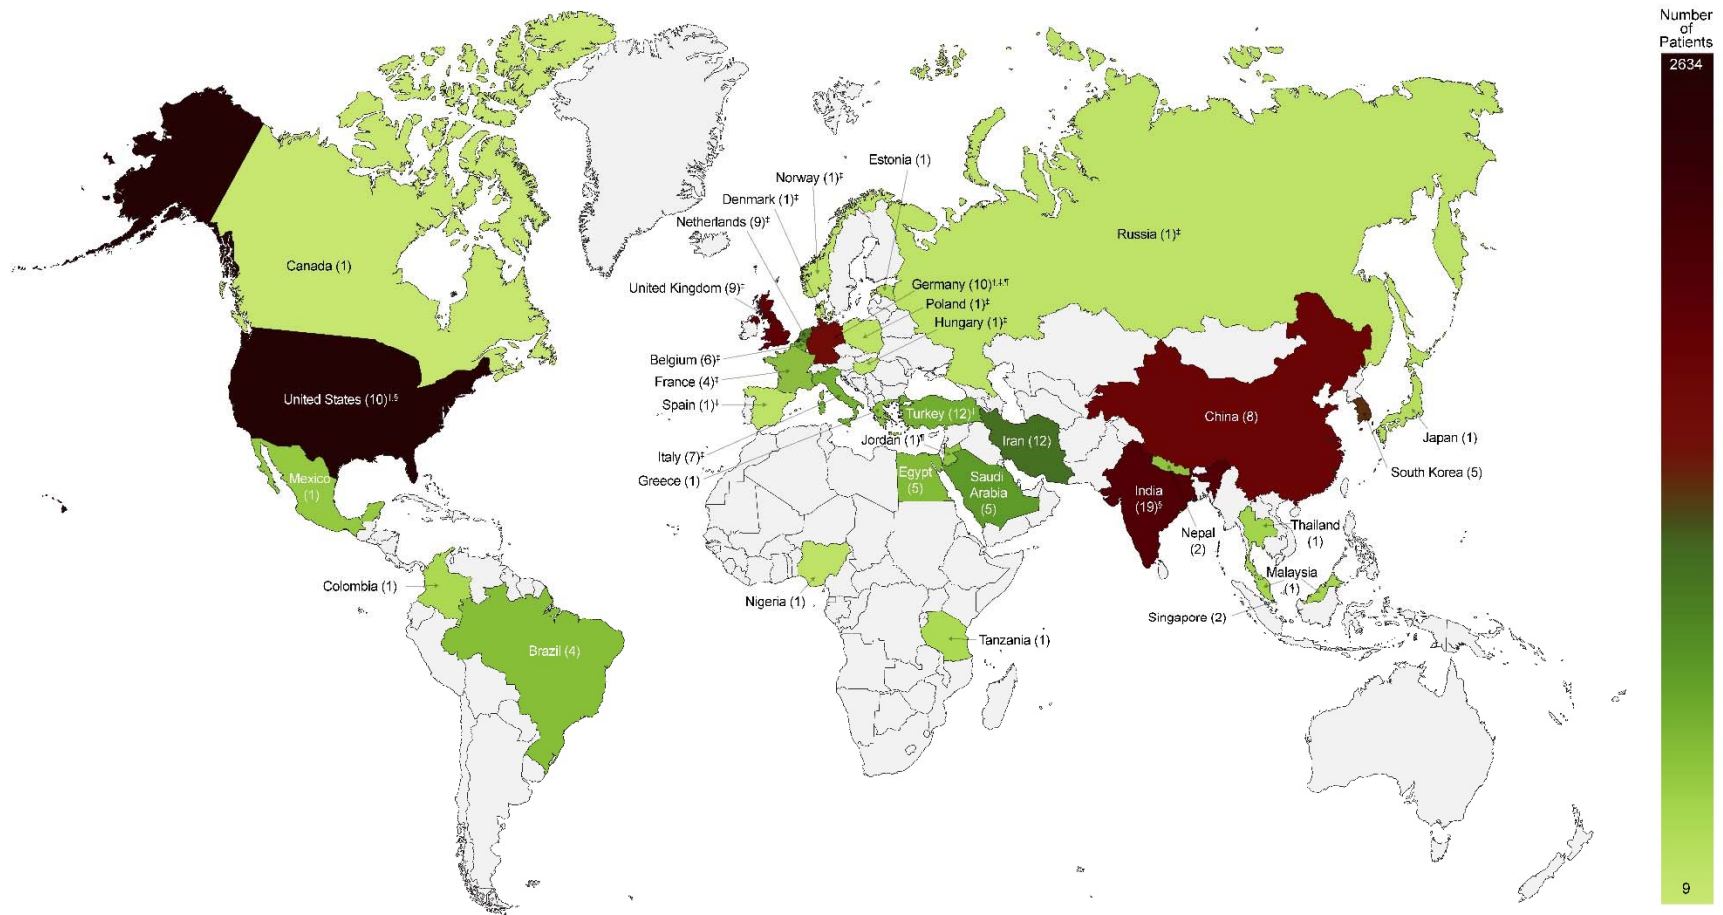

Number of patients is the sum of patients across studies from each country with multiples from the same patient population excluded. Among multinational studies, where the number of patients from each country was not available in the published studies, the full population was included for each country. The number of unique studies is shown in parentheses after the name of each country.

\* Countries were assigned to geographic regions as follows: Africa (Nigeria, Tanzania), Europe (Belgium, Denmark, Estonia, France, Germany, Greece, Italy, Netherlands, Norway, Poland, Russia, Spain, United Kingdom), Eastern Asia (China, Japan, Malaysia, Singapore, South Korea, Thailand), Southern Asia (India, Nepal), Middle East (Egypt, Iran, Jordan, Saudi Arabia, Turkey), North

America (Canada, Mexico, United States), and South America (Brazil, Colombia).

† Includes 2 studies conducted in Europe (Germany) and North America (United States).

‡ Includes 1 study conducted in Europe (Belgium, Denmark, France, Germany, Hungary, Italy, Netherlands, Norway, Poland, Russia, Spain, United Kingdom) and the Middle East (Turkey).

§ Includes 1 study conducted in North America (United States) and Southern Asia (India).

¶ Includes 1 study conducted in Europe (Germany) and the Middle East (Jordan).

**Table S1. Generic Quality-of-Life Assessment Tools and Outcomes Among Studies That Reported Total Scores in the Overall Population**

| <b>Study</b>                      | <b>Country</b> | <b>Sample Size at Baseline</b> | <b>Total Score, Mean (SD)</b>                                            | <b>Total Score, Median (Range)</b>             |
|-----------------------------------|----------------|--------------------------------|--------------------------------------------------------------------------|------------------------------------------------|
| <i>SF-36</i>                      |                |                                |                                                                          |                                                |
| Ghaderi 2014 <sup>1</sup>         | Iran           | 70                             | 478 (142)                                                                | --                                             |
| Ghajarzadeh 2012 <sup>2</sup>     | Iran           | 100                            | 63.8 (19.4)                                                              | --                                             |
| Linthorst Homan 2008 <sup>3</sup> | Netherlands    | 232                            | PCS, 54.9 (7.0)<br>MCS, 48.1 (10.7)                                      | --                                             |
| Linthorst Homan 2009 <sup>4</sup> | Netherlands    | 245                            | PCS, 54.0 (8.6)<br>MCS, 46.3 (11.2)                                      | --                                             |
| Xu 2017 <sup>5</sup>              | South Korea    | 37                             | 70.4 (15.3)                                                              | --                                             |
| <i>SF-36 v2</i>                   |                |                                |                                                                          |                                                |
| Yang 2017 <sup>6</sup>            | United States  | 100                            | PCS, 53.6 (8.32)<br>MCS, 48.0 (10.8)                                     | --                                             |
| <i>SF-12</i>                      |                |                                |                                                                          |                                                |
| Ezzedine 2015 <sup>7</sup>        | France         | 280                            | PCS, 55.4 (7.1)<br>MCS, 38.8 (11.3)                                      | PCS, 57.5 (31.4–68.7)<br>MCS, 38.6 (12.7–62.4) |
| <i>PedsQL</i>                     |                |                                |                                                                          |                                                |
| Bilgic 2011 <sup>8</sup>          | Turkey         | 16                             | Children (8–12 y):<br>PedsQL-C, 78.6 (15.1)<br>PedsQL-P, 73.3 (16.4)     | --                                             |
|                                   |                | 25                             | Adolescents (13–18 y):<br>PedsQL-C, 76.5 (8.50)<br>PedsQL-P, 73.5 (10.1) | --                                             |
| Önen 2018 <sup>9</sup>            | Turkey         | 41                             | PedsQL-C, 77.0 (13.2)<br>PedsQL-P, 72.3 (13.3)                           | --                                             |
| Ucuz 2020 <sup>10</sup>           | Turkey         | 30                             | PedsQL-C, 90.2 (–)                                                       | -- (77.3–91.7)                                 |
| <i>GHQ</i>                        |                |                                |                                                                          |                                                |
| Temel 2019 <sup>11</sup>          | Turkey         | 50                             | 23.2 (5.38)                                                              | --                                             |
| <i>GHQ-28</i>                     |                |                                |                                                                          |                                                |
| Hamidizadeh 2020 <sup>12</sup>    | Iran           | 99                             | 26.5 (15.2)                                                              | --                                             |
| <i>EQ-5D</i>                      |                |                                |                                                                          |                                                |
| Radtke 2009 <sup>13</sup>         | Germany        | 1023                           | 83.6 (–)                                                                 | --                                             |
| <i>SRHMS</i>                      |                |                                |                                                                          |                                                |
| Amer 2015 <sup>14</sup>           | China          | 75                             | 329 (35.2)                                                               | --                                             |

| <b>Study</b>                     | <b>Country</b> | <b>Sample Size at Baseline</b> | <b>Total Score, Mean (SD)</b>                                 | <b>Total Score, Median (Range)</b> |
|----------------------------------|----------------|--------------------------------|---------------------------------------------------------------|------------------------------------|
| <i>PHS</i>                       |                |                                |                                                               |                                    |
| Temel 2019 <sup>11</sup>         | Turkey         | 50                             | 3.92 (3.03)                                                   | --                                 |
| <i>VAS</i>                       |                |                                |                                                               |                                    |
| Al-Shobaili 2015 <sup>15</sup>   | Saudi Arabia   | 134                            | Life disturbance, 8.1 (1.14)<br>Life satisfaction, 2.0 (0.33) | --                                 |
| Gupta 2014 <sup>16</sup>         | India          | 161                            | 5.81 (3.15)                                                   | --                                 |
| <i>VAS-based questionnaire</i>   |                |                                |                                                               |                                    |
| Al-Shobaili 2014 <sup>17</sup>   | Saudi Arabia   | 48                             | 5.74 (3.26)                                                   | --                                 |
| <i>EQ-VAS</i>                    |                |                                |                                                               |                                    |
| Balieva 2017 <sup>18</sup>       | Europe, Turkey | 25                             | 83.1 (10.3)                                                   | --                                 |
| <i>PBI</i>                       |                |                                |                                                               |                                    |
| Radtke 2010 <sup>19</sup>        | Germany        | 680                            | 1.03 (1.12)                                                   | -- (0–4)                           |
| <i>PBI 2.0</i>                   |                |                                |                                                               |                                    |
| Topp 2019 <sup>20</sup>          | Germany        | 46                             | 1.5 (1.3)                                                     | --                                 |
| <i>DFI</i>                       |                |                                |                                                               |                                    |
| Amer 2015 <sup>14</sup>          | China          | 50                             | 11.0 (–)                                                      | --                                 |
| <i>QLCCDQ</i>                    |                |                                |                                                               |                                    |
| Andrade 2020 <sup>21</sup>       | United States  | 117                            | 5.9 (1.1)                                                     | --                                 |
| <i>DeFIS</i>                     |                |                                |                                                               |                                    |
| Savas Erdogan 2020 <sup>22</sup> | Turkey         | 29                             | 14.5 (9.33)                                                   | -- (0–45)                          |

DeFIS, Dermatological Family Impact Scale; DFI, Dermatitis Family Impact; EQ-5D, EuroQol 5-Dimension; EQ-VAS, EuroQol Visual Analog Scale; GHQ, General Health Questionnaire; MCS, mental component score; PBI, Patient Benefit Index; PCS, physical component score; PedsQL, Pediatric Quality of Life; PedsQL-C, PedsQL Child; PedsQL-P, PedsQL Parent; PHS, Perceived Health Status; QLCCDQ, Quality of Life in a Child's Chronic Disease Questionnaire; SF-12, Short-Form 12; SF-36, Short-Form 36; SRHMS, Self-Rated Health Measurement Scale; VAS, Visual Analog Scale.



**Table S2. Generic Quality-of-Life Assessment Tools and Outcomes in Interventional Studies**

| Study                          | Country        | Sample Size at Baseline | Treatment Group                               | Baseline                                                                            | Follow-Up      |                                                                                     | P Value vs Baseline | P Value vs Comparator |
|--------------------------------|----------------|-------------------------|-----------------------------------------------|-------------------------------------------------------------------------------------|----------------|-------------------------------------------------------------------------------------|---------------------|-----------------------|
|                                |                |                         |                                               | Total Score                                                                         | Last Follow-Up | Total Score                                                                         |                     |                       |
| <i>EQ-5D-5L</i>                |                |                         |                                               |                                                                                     |                |                                                                                     |                     |                       |
| Batchelor 2020 <sup>23</sup>   | United Kingdom | --                      | Topical corticosteroids                       | Mean (SD), 0.9 (0.1)                                                                | 9 months       | Mean (SD), 0.9 (0.2)                                                                | NA                  | Ref                   |
|                                |                | --                      | NB-UVB                                        | Mean (SD), 0.9 (0.2)                                                                | 9 months       | Mean (SD), 0.9 (0.1)                                                                | NA                  | NS                    |
|                                |                | --                      | Topical corticosteroids + NB-UVB              | Mean (SD), 0.9 (0.2)                                                                | 9 months       | Mean (SD), 0.9 (0.1)                                                                | NA                  | NS                    |
| <i>CHU-9D</i>                  |                |                         |                                               |                                                                                     |                |                                                                                     |                     |                       |
| Batchelor 2020 <sup>23</sup>   | United Kingdom | 40                      | Topical corticosteroids                       | Mean (SD), 1.0 (0.1)                                                                | 9 months       | Mean (SD), 1.0 (0.1)                                                                | NA                  | Ref                   |
|                                |                | 39                      | NB-UVB                                        | Mean (SD), 0.9 (0.1)                                                                | 9 months       | Mean (SD), 1.0 (0.0)                                                                | NA                  | NS                    |
|                                |                | 40                      | Topical corticosteroids + NB-UVB              | Mean (SD), 0.9 (0.1)                                                                | 9 months       | Mean (SD), 0.9 (0.1)                                                                | NA                  | NS                    |
| <i>VAS</i>                     |                |                         |                                               |                                                                                     |                |                                                                                     |                     |                       |
| Akdeniz 2014 <sup>24</sup>     | Turkey         | 15                      | NB-UVB + topical calcipotriol + betamethasone | Mean (SD), 9.53 (0.19)                                                              | 6 months       | Mean (SD), 3.27 (0.78)                                                              | <0.01               | NA                    |
|                                |                | 15                      | NB-UVB + topical calcipotriol                 | Mean (SD), 9.73 (0.12)                                                              | 6 months       | Mean (SD), 3.20 (0.56)                                                              | <0.01               | NA                    |
|                                |                | 15                      | NB-UVB                                        | Mean (SD), 9.53 (0.17)                                                              | 6 months       | Mean (SD), 4.07 (0.78)                                                              | <0.01               | NA                    |
| Al-Shobaili 2015 <sup>15</sup> | Saudi Arabia   | 134                     | 308-nm monochrome excimer light               | Life disturbance: Mean (SD), 8.1 (1.14)<br>Life satisfaction: Mean (SD), 2.0 (0.33) | 16 weeks       | Life disturbance: Mean (SD), 2.7 (0.14)<br>Life satisfaction: Mean (SD), 6.8 (1.05) | <0.001              | NA                    |

| Study                          | Country      | Sample Size at Baseline | Treatment Group                          | Baseline                  | Follow-Up          |                           | P Value vs Baseline                  | P Value vs Comparator |
|--------------------------------|--------------|-------------------------|------------------------------------------|---------------------------|--------------------|---------------------------|--------------------------------------|-----------------------|
|                                |              |                         |                                          | Total Score               | Last Follow-Up     | Total Score               |                                      |                       |
| Ibrahim 2020 <sup>25</sup>     | Egypt        | 19                      | MBEH 20%                                 | Mean (SD),<br>8.3 (2.43)  | 12 months          | Mean (SD),<br>1.47 (1.98) | <0.001                               | NA                    |
|                                |              | 20                      | MBEH 40%                                 | Mean (SD),<br>9.1 (0.97)  | 12 months          | Mean (SD),<br>2.45 (2.78) | <0.001                               | NA                    |
| <i>VAS-based Questionnaire</i> |              |                         |                                          |                           |                    |                           |                                      |                       |
| Al-Shobaili 2014 <sup>17</sup> | Saudi Arabia | 48                      | 308-nm excimer laser                     | Mean (SD),<br>5.74 (3.26) | 16.8–20.2 sessions | NA                        | <0.05 for shorter treatment duration | NA                    |
| <i>Questionnaire</i>           |              |                         |                                          |                           |                    |                           |                                      |                       |
| Singh 2013 <sup>26</sup>       | India        | 12                      | PUVA                                     | NA                        | 36 weeks           | Mean (SD),<br>10.5 (7.6)* | NA                                   | 0.04                  |
|                                |              | 7                       | PUVA sol                                 | NA                        | 36 weeks           | Mean (SD),<br>3.6 (2.8)*  | NA                                   | Ref                   |
| Zhang 2017 <sup>27</sup>       | China        | 75                      | Yiqiqubai granule                        | NA                        | 6 months           | NA                        | <0.05 for 3/4 domains                | NS                    |
|                                |              | 78                      | 308-nm excimer laser                     | NA                        | 6 months           | NA                        | <0.05 for 3/4 domains                | NS                    |
|                                |              | 80                      | Yiqiqubai granule + 308-nm excimer laser | NA                        | 6 months           | NA                        | <0.05 for 3/4 domains                | NS                    |

CHU-9D, Child Health Utility 9-Dimension; EQ-5D-5L, EuroQol 5-Dimension five level; MBEH, monobenzyl ether of hydroquinone; NA, not available/applicable; NB-UVB, narrow-band ultraviolet B; NS, not significant; PUVA, psoralen plus ultraviolet A; VAS, Visual Analog Scale.

\* Higher scores indicated better quality of life in the study-specific questionnaire.

## References

- 1 Ghaderi R, Saadatjoo A. Evaluating of life quality in Iranian patients with vitiligo using generic and special questionnaires. *Shiraz E-Med J* 2014; **15**.
- 2 Ghajarzadeh M, Ghiasi M, Kheirkhah S. Associations between skin diseases and quality of life: a comparison of psoriasis, vitiligo, and alopecia areata. *Acta Med Iran* 2012; **50**: 511-5.
- 3 Linthorst Homan MW, de Korte J, Grootenhuis MA et al. Impact of childhood vitiligo on adult life. *Br J Dermatol* 2008; **159**: 915-20.
- 4 Linthorst Homan MW, Spuls PI, de Korte J et al. The burden of vitiligo: patient characteristics associated with quality of life. *J Am Acad Dermatol* 2009; **61**: 411-20.
- 5 Xu ST, Oh EH, Kim JE et al. Comparative study of quality of life between psoriasis, vitiligo and autoimmune bullous disease. *Hong Kong J Dermatol Venereol* 2017; **25**: 57-64.
- 6 Yang Y, Zapata L, Rodgers C et al. Quality of life in patients with vitiligo using the short form-36. *Br J Dermatol* 2017; **177**: 1764-6.
- 7 Ezzedine K, Grimes PE, Meurant JM et al. Living with vitiligo: results from a national survey indicate differences between skin phototypes. *Br J Dermatol* 2015; **173**: 607-9.
- 8 Bilgic O, Bilgic A, Akis HK et al. Depression, anxiety and health-related quality of life in children and adolescents with vitiligo. *Clin Exp Dermatol* 2011; **36**: 360-5.
- 9 Önen Ö, Kundak S, Özek Erkurun H et al. Quality of life, depression, and anxiety in Turkish children with vitiligo and their parents. *Psychiatr Clin Psychopharmacol* 2018; **29**: 492-501.

- 10 Ucuş I, Altunışık N, Sener S et al. Quality of life, emotion dysregulation, attention deficit and psychiatric comorbidity in children and adolescents with vitiligo. *Clin Exp Dermatol* 2021; **46**: 510-5.
- 11 Temel A, Bozkurt S, Senol Y et al. Internalized stigma in patients with acne vulgaris, vitiligo, and alopecia areata. *Turk J Dermatol* 2019; **13**: 109-16.
- 12 Hamidzadeh N, Ranjbar S, Ghanizadeh A et al. Evaluating prevalence of depression, anxiety and hopelessness in patients with vitiligo on an Iranian population. *Health Qual Life Outcomes* 2020; **18**: 20.
- 13 Radtke MA, Schafer I, Gajur A et al. Willingness-to-pay and quality of life in patients with vitiligo. *Br J Dermatol* 2009; **161**: 134-9.
- 14 Amer AA, McHepange UO, Gao XH et al. Hidden victims of childhood vitiligo: impact on parents' mental health and quality of life. *Acta Derm Venereol* 2015; **95**: 322-5.
- 15 Al-Shobaili HA. Treatment of vitiligo patients by excimer laser improves patients' quality of life. *J Cutan Med Surg* 2015; **19**: 50-6.
- 16 Gupta V, Sreenivas V, Mehta M et al. Measurement properties of the vitiligo impact scale-22 (VIS-22), a vitiligo-specific quality-of-life instrument. *Br J Dermatol* 2014; **171**: 1084-90.
- 17 Al-Shobaili HA. Correlation of clinical efficacy and psychosocial impact on vitiligo patients by excimer laser treatment. *Ann Saudi Med* 2014; **34**: 115-21.
- 18 Balieva F, Kupfer J, Lien L et al. The burden of common skin diseases assessed with the EQ5D: a European multicentre study in 13 countries. *Br J Dermatol* 2017; **176**: 1170-8.

- 19 Radtke MA, Schafer I, Gajur AI et al. Clinical features and treatment outcomes of vitiligo from the patients' perspective: results of a national survey in Germany. *Dermatology* 2010; **220**: 194-200.
- 20 Topp J, Augustin M, von Usslar K et al. Measuring patient needs and benefits in dermatology using the patient benefit index 2.0: a validation study. *Acta Derm Venereol* 2019; **99**: 211-7.
- 21 Andrade G, Rangu S, Provini L et al. Childhood vitiligo impacts emotional health of parents: a prospective, cross-sectional study of quality of life for primary caregivers. *J Patient Rep Outcomes* 2020; **4**: 20.
- 22 Savas Erdogan S, Falay Gur T, Dogan B. Anxiety and depression in pediatric patients with vitiligo and alopecia areata and their parents: a cross-sectional controlled study. *J Cosmet Dermatol* 2021; **20**: 2232-9.
- 23 Batchelor JM, Thomas KS, Akram P et al. Home-based narrowband UVB, topical corticosteroid or combination for children and adults with vitiligo: HI-Light vitiligo three-arm RCT. *Health Technol Assess* 2020; **24**: 1-128.
- 24 Akdeniz N, Yavuz IH, Gunes Bilgili S et al. Comparison of efficacy of narrow band UVB therapies with UVB alone, in combination with calcipotriol, and with betamethasone and calcipotriol in vitiligo. *J Dermatolog Treat* 2014; **25**: 196-9.
- 25 Ibrahim S, El Mofty M, Mostafa W et al. Monobenzyl ether of hydroquinone 20 and 40% cream in depigmentation of patients with vitiligo: a randomized controlled trial. *J Egypt Womens Dermatol Soc* 2020; **17**: 130-7.
- 26 Singh S, Khandpur S, Sharma VK et al. Comparison of efficacy and side-effect profile of oral PUVA vs. oral PUVA sol in the treatment of vitiligo: a 36-week prospective study. *J Eur Acad Dermatol Venereol* 2013; **27**: 1344-51.

- 27 Zhang C, Zhou L, Huang J et al. A combination of Yiqiqubai granule and 308-nm excimer laser in treatment of segmental vitiligo: a prospective study of 233 patients. *J Dermatolog Treat* 2017; **28**: 668-71.
